# Supplementary material
Source: PubMed Central journal article supplement (PMC10308351)
Supplement: EMBJ-42-e112542-s004.pdf [file EMBJ-42-e112542-s004.pdf]

## Expanded View Figures

### Figure EV1. ORF6 targets to LDs.

- A HeLa cells were transfected with Strep tagged SARS-CoV-2 proteins for 12 h and treated with 200  $\mu$ M OA for another 12 h, then stained with anti-Flag (red). LDs were labeled with BODIPY-493/503 (green). Cells were imaged by confocal microscopy. Scale bar represents 10  $\mu$ m.
- B HeLa cells were transfected with ORF6-GFP or GFP-ORF6 for 12 h and treated with 200  $\mu$ M OA for another 12 h. LDs were labeled with LipidTOX Deep Red (red). Cells were imaged by confocal microscopy. Scale bar represents 10  $\mu$ m.
- C HeLa cells were transfected with ORF6-GFP or GFP-ORF6 for 12 h and treated or untreated with 200  $\mu$ M OA for another 12 h. Cell viability was analyzed. Eight biological replicates were performed. Two-tailed Unpaired Student's *t*-test, ns means no significance. Error bars represent the mean  $\pm$  SD.
- D HeLa cells were transfected with Flag tagged ORF6 of different coronavirus strains and treated with 200  $\mu$ M OA for another 12 h, then stained with anti-Flag (red). LDs were labeled with BODIPY-493/503 (green). Cells were imaged by confocal microscopy. Scale bar represents 10  $\mu$ m.
- E Colocalization of ORF6 and LDs (Pearson's Coefficient),  $n = 20$  cells, three independent experiments. Two-tailed Unpaired Student's *t*-test, \* $P < 0.05$ , \*\* $P < 0.01$ , ns means no significance. Error bars represent the mean  $\pm$  SD.
- F HEK293T cells were transfected with ORF6-Flag or its mutants and treated or untreated with 0.1 mM DSS for 30 min. Cell lysates were analyzed via WB.
- G Luciferase assays were performed as described in methods. Three biological replicates were performed. Two-tailed Unpaired Student's *t*-test, \*\*\*\* $P < 0.0001$ . Error bars represent the mean  $\pm$  SD.

Source data are available online for this figure.

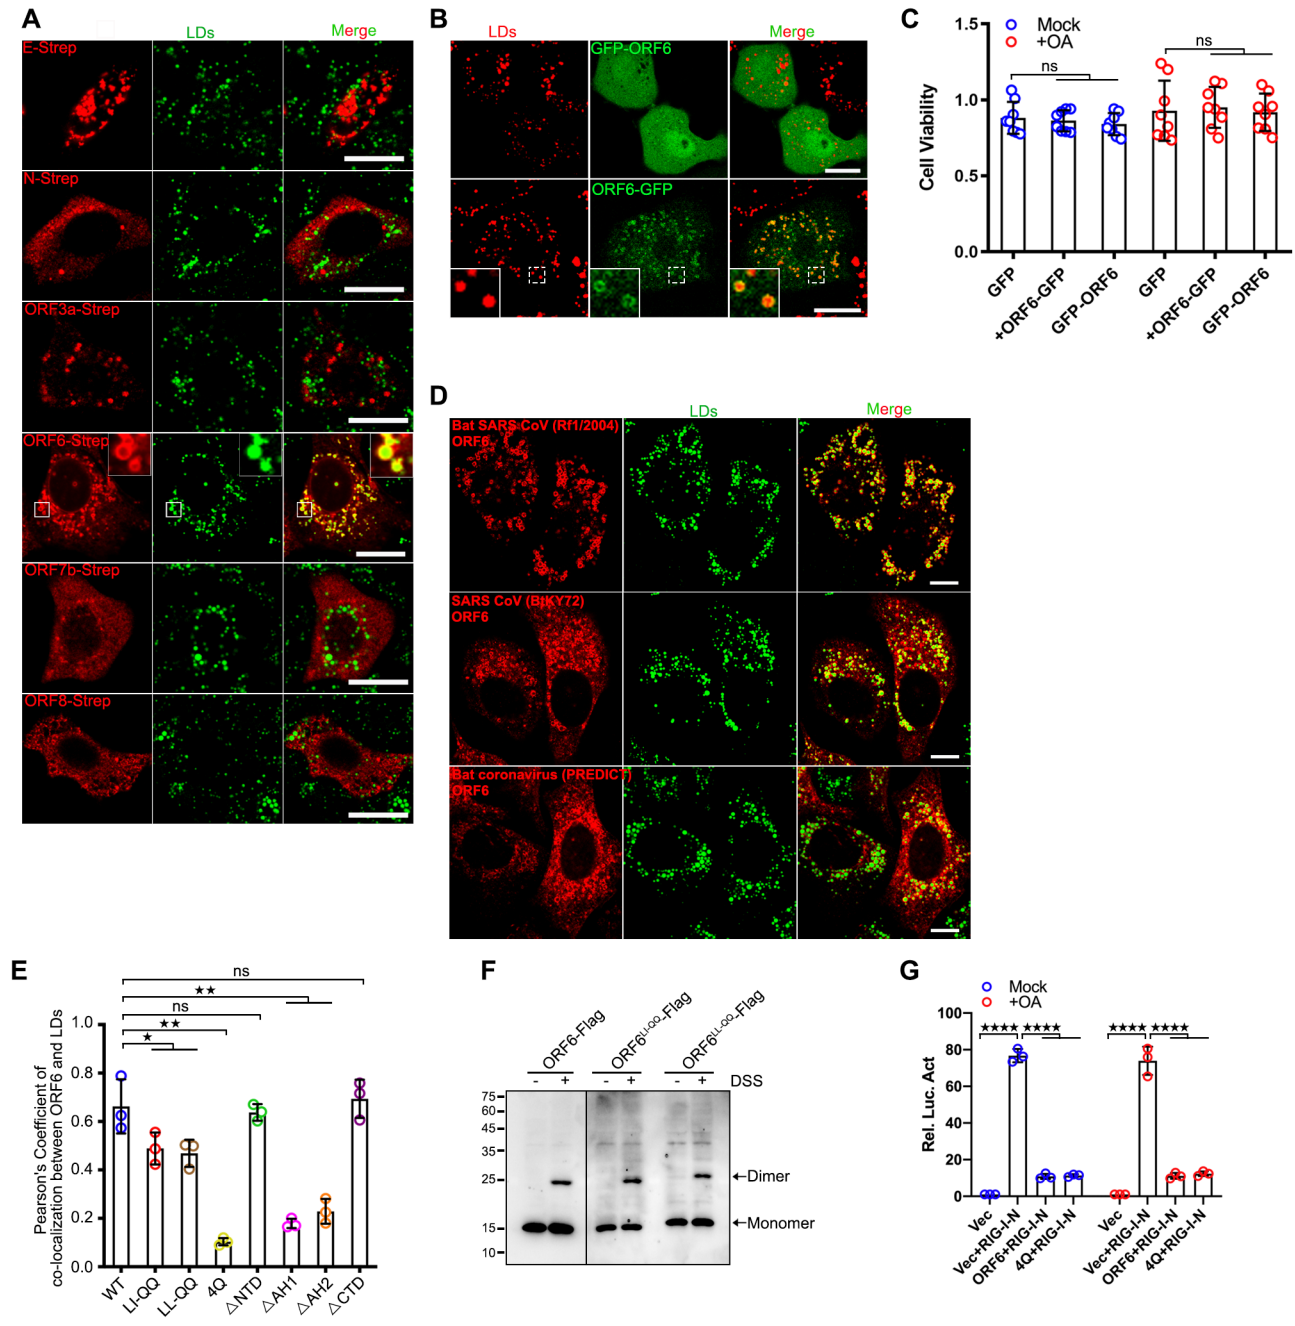

Figure EV1.

**Figure EV2. ORF6 promotes LD biogenesis.**

- A Cells expressing the ORF6<sup>4Q</sup>-Flag were treated with 200  $\mu$ M OA for indicated times, then fixed and stained with anti-Flag (green). LDs were labeled with LipidTOX Deep Red (red). The nuclei of cells were stained with DAPI. Cells were imaged by confocal microscopy. Scale bar represents 10  $\mu$ m.
- B, C The interactions of GST tagged ORF6 or the mutants with the His tagged DGAT1 and His tagged DGAT2 were analyzed by GST pull-down assay.
- D Vero-E6 cells were infected or non-infected with SARS-CoV-2 for 24 h. Cell lysates were analyzed via WB.
- E HeLa cells were transfected with gradient of ORF6-Flag for 24 h. Protein levels of endogenous DGAT1, DGAT2, and ATGL were analyzed via WB.
- F HeLa cells were transfected with gradient of ORF6-Flag for 24 h. RNA levels of *dgat1* and *dgat2* were analyzed via QPCR, three independent experiments. Two-tailed Unpaired Student's *t*-test, ns means no significance. Error bars represent the mean  $\pm$  SD.
- G Gene Ontology (GO) enrichment analysis was performed on the human interacting proteins of SARS-CoV-2 ORF6 protein, *P*-values calculated by hypergeometric test and a false discovery rate was used to account for multiple hypothesis testing. The top GO term was shown in the graph.

Source data are available online for this figure.

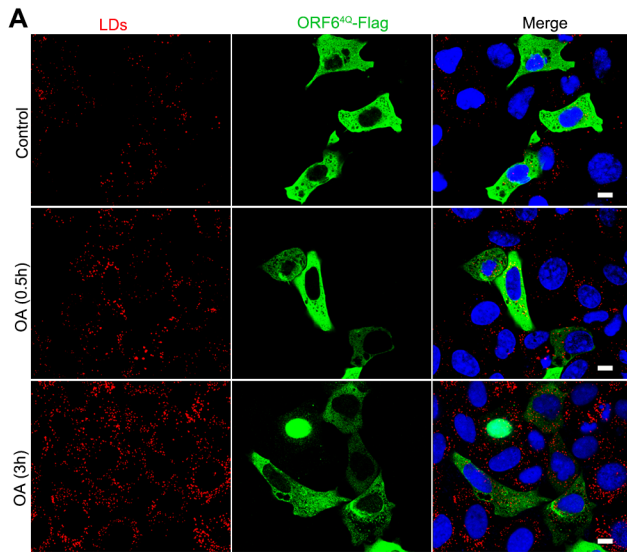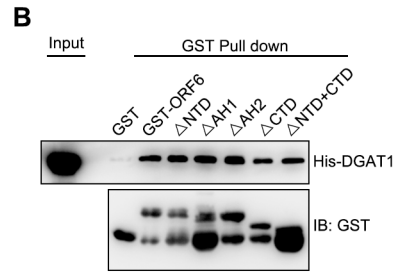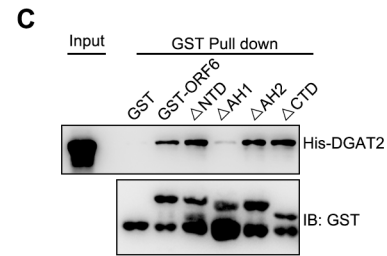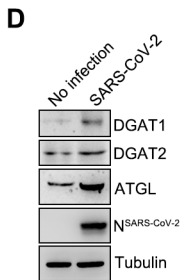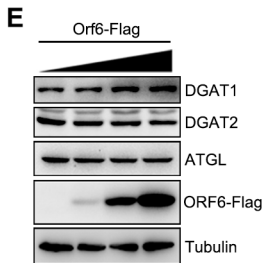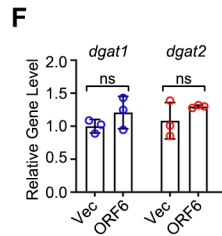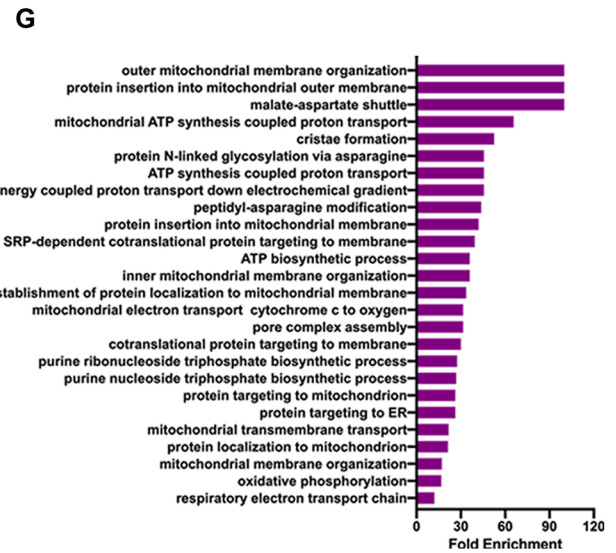

Figure EV2.

**Figure EV3. ORF6 interacts with BAP31 and USE1.**

- A GFP or GFP tagged ER membrane proteins were co-expressed in HEK293T cells with ORF6-Flag. Protein interactions were analyzed by immunoprecipitation with anti-GFP beads and immunoblotting analysis.
- B Vector were co-expressed with mCherry-RAMP4. Cells were treated with 200  $\mu$ M OA for 12 h, and then fixed. The ER was visualized with mCherry-RAMP4 (red). LDs were labeled with LipidTOX Deep Red (white). Cells were imaged by confocal microscopy. Scale bar represents 10  $\mu$ m.
- C Cells co-expressing the ORF6-Flag with mCherry tagged RAMP4 were transfected with BAP31 or USE1 siRNA for 36 h and treated with 200  $\mu$ M OA for 12 h, then fixed and stained with anti-Flag (green). LDs were labeled with LipidTOX Deep Red (blue). Cells were imaged by confocal microscopy. Scale bar represents 10  $\mu$ m. Quantification of average number of LD-ER contacts per LD. 12 cells (Negative) and 25 cells (BAP31/USE1 KD) from three independent experiments were calculated. Two-tailed Unpaired Student's *t*-test, \*\*\*\**P* < 0.0001, ns means no significance. Error bars represent the mean  $\pm$  SD.
- D Cell viability was analyzed in Fig 4L, three independent experiments. Two-tailed Unpaired Student's *t*-test, ns means no significance. Error bars represent the mean  $\pm$  SD.

Source data are available online for this figure.

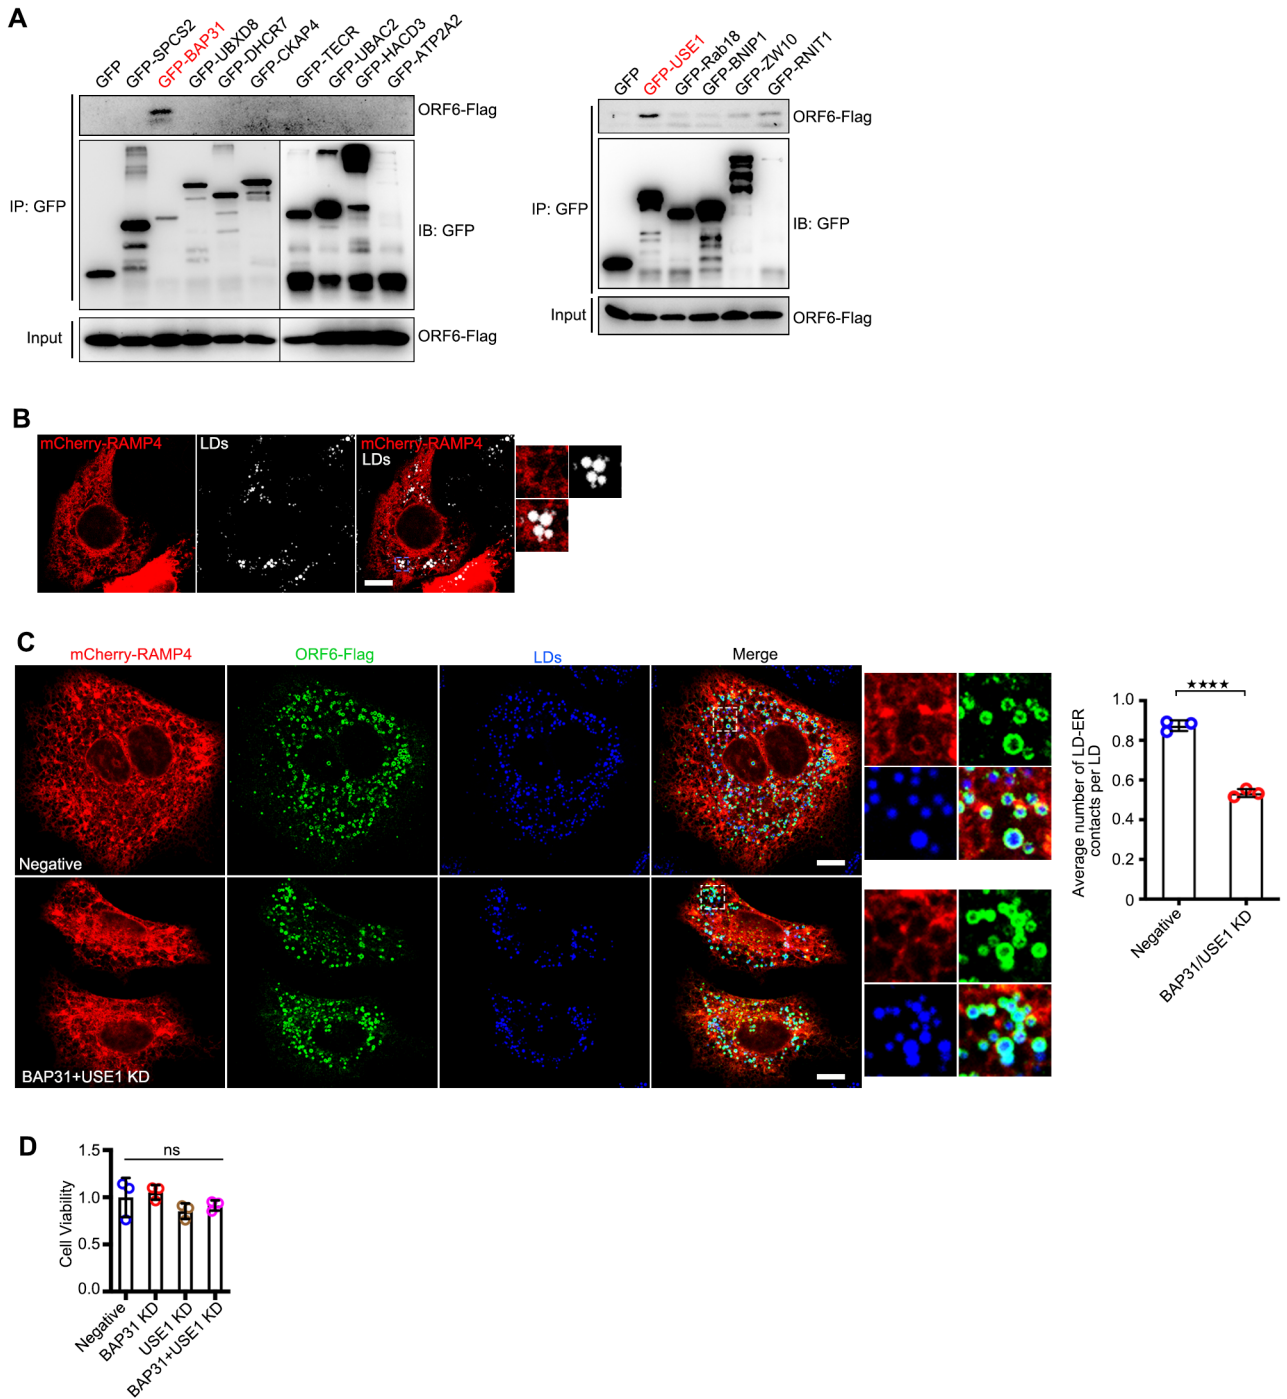

Figure EV3.

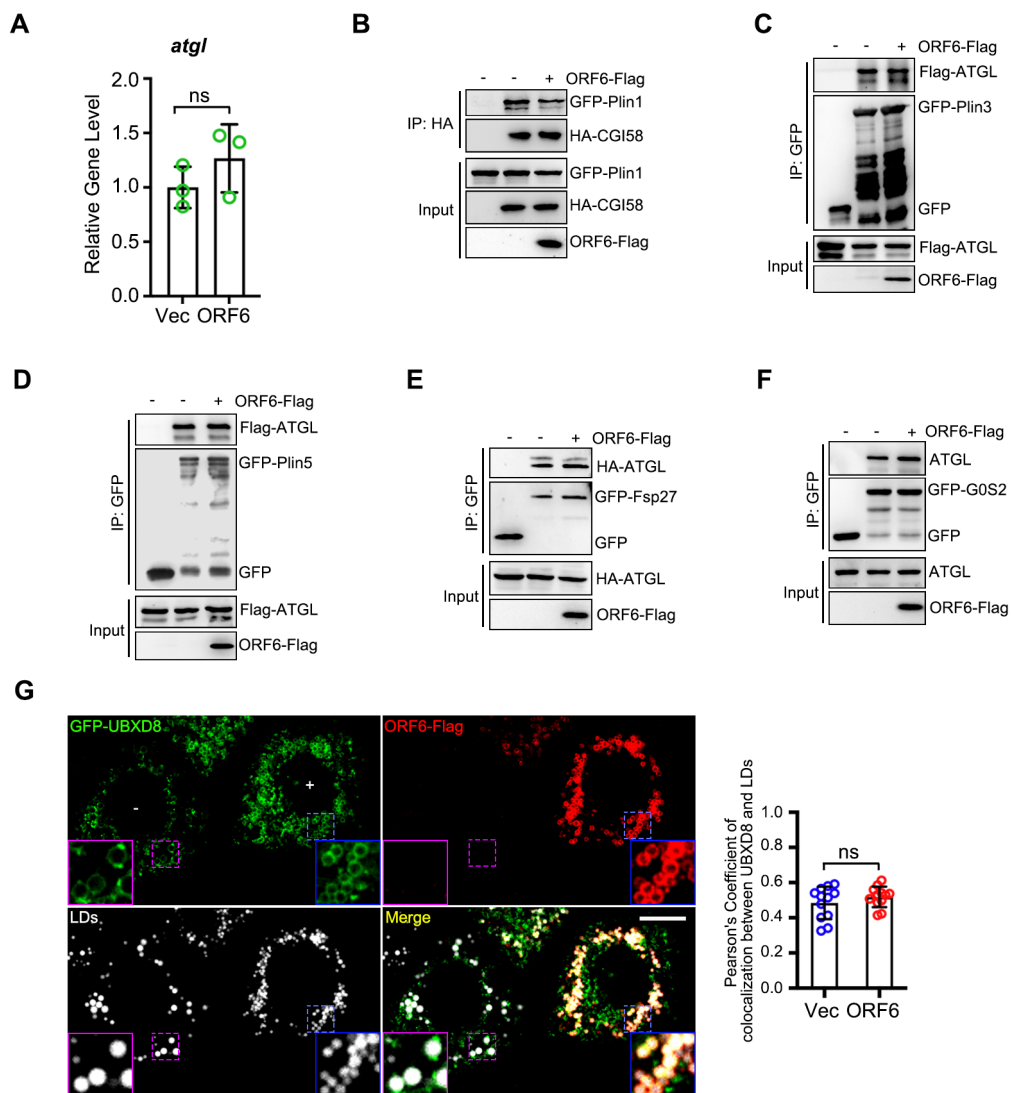

**Figure EV4. ORF6 enhances lipolysis.**

- A** QPCR analysis of RNA level of *atgl* in vector and ORF6-Flag expressed cells, three independent experiments. Two-tailed Unpaired Student's *t*-test, ns means no significance. Error bars represent the mean  $\pm$  SD.
- B–F** The effect of ORF6-Flag on the interactions of GFP-Plin1 with HA-CGI58, or GFP-Plin3 with Flag-ATGL, or GFP-Plin5 with Flag-ATGL, or GFP-Fsp27 with HA-ATGL, or GOS2-GFP with ATGL were analyzed by immunoprecipitation.
- G** HeLa cells were transfected with GFP-UBXD8 and vector or ORF6-Flag for 12 h and treated with 200  $\mu$ M OA for 12 h, then fixed and stained with anti-Flag (red). LDs were labeled with LipidTOX Deep Red (white). Cells were imaged by confocal microscopy. Scale bar represents 10  $\mu$ m. Blue ROIs indicate cells expressing ORF6 and purple ROIs indicate the cells without ORF6 expression. Colocalization of UBXD8 and LDs (Pearson's Coefficient),  $n = 12$  cells, two independent experiments. Two-tailed Unpaired Student's *t*-test, ns means no significance. Error bars represent the mean  $\pm$  SD.

Source data are available online for this figure.

**Figure EV5. ORF6 links LDs to mitochondria.**

- A HeLa-Parkin cells were transfected with vector or ORF6-Flag for 24 h, or treated with 10  $\mu$ M CCCP for 6 h. Cell lysates were analyzed via WB.
- B Representative transmission electron micrograph showing the close contact between LD, ER and mitochondria in ORF6 expressed HeLa cells treated with 200  $\mu$ M OA for 12 h. LD, lipid droplets. ER, endoplasmic reticulum. M, mitochondria. Scale bars 500 nm.
- C Representative transmission electron micrograph of ORF6-Flag stable expressing or wild-type HeLa cells. Red arrows mark the contact sites between LDs and mitochondria. LD, lipid droplets. M, mitochondria.
- D Cos7 cells expressing ORF6<sup>4Q</sup>-Flag or ORF6<sup>AAH1</sup>-Flag were treated with 200  $\mu$ M OA for 12 h, and then were fixed and stained with anti-Flag (white) and anti-Tom20 (red). Tom20 represents mitochondria marker. LDs were labeled with BODIPY-493/503 (green). Cells were imaged by confocal microscopy. Scale bar represents 10  $\mu$ m.
- E Cells were transfected with Negative or si-ORF6 for 24 h, and then further transfected with ORF6-Strep, or ORF3a-Strep, or ORF7a-Strep, or ORF7b-Strep, or ORF8-Strep, or ORF9b-Strep, or ORF9c-Strep, or ORF10-Strep for 24 h. Cell lysates were analyzed via WB.
- F Cells were transfected with Negative or si-ORF6 for 24 h, and then further transfected with ORF6-Flag (RNAi resistant), or ORF6<sup>4Q</sup>-Flag (RNAi resistant) for 24 h. Cell lysates were analyzed via WB.
- G Vero-E6 cells were transfected with Negative or si-ORF6 for 24 h, and then further transfected with ORF6-Flag (RNAi resistant), or ORF6<sup>4Q</sup>-Flag (RNAi resistant) for 12 h. Cells were further infected with SARS-CoV-2 for 24 h. Viral RNA level was determined by RT-qPCR, three independent replicates. Two-tailed Unpaired Student's *t*-test, \**P* < 0.05. ns means no significance. Error bars represent the mean  $\pm$  SD.
- H–J Purified GST protein or GST-ORF6 or its mutants were incubated with purified His tagged MTX1, or MTX2, or SAMM50, and analyzed the interactions by GST pull-down.
- K Quantification of LD number in (Fig 7F). 25 cells (Negative) and 50 cells (Triple KD) from three independent experiments were calculated. Two-tailed Unpaired Student's *t*-test, ns means no significance. Error bars represent the mean  $\pm$  SD.

Source data are available online for this figure.



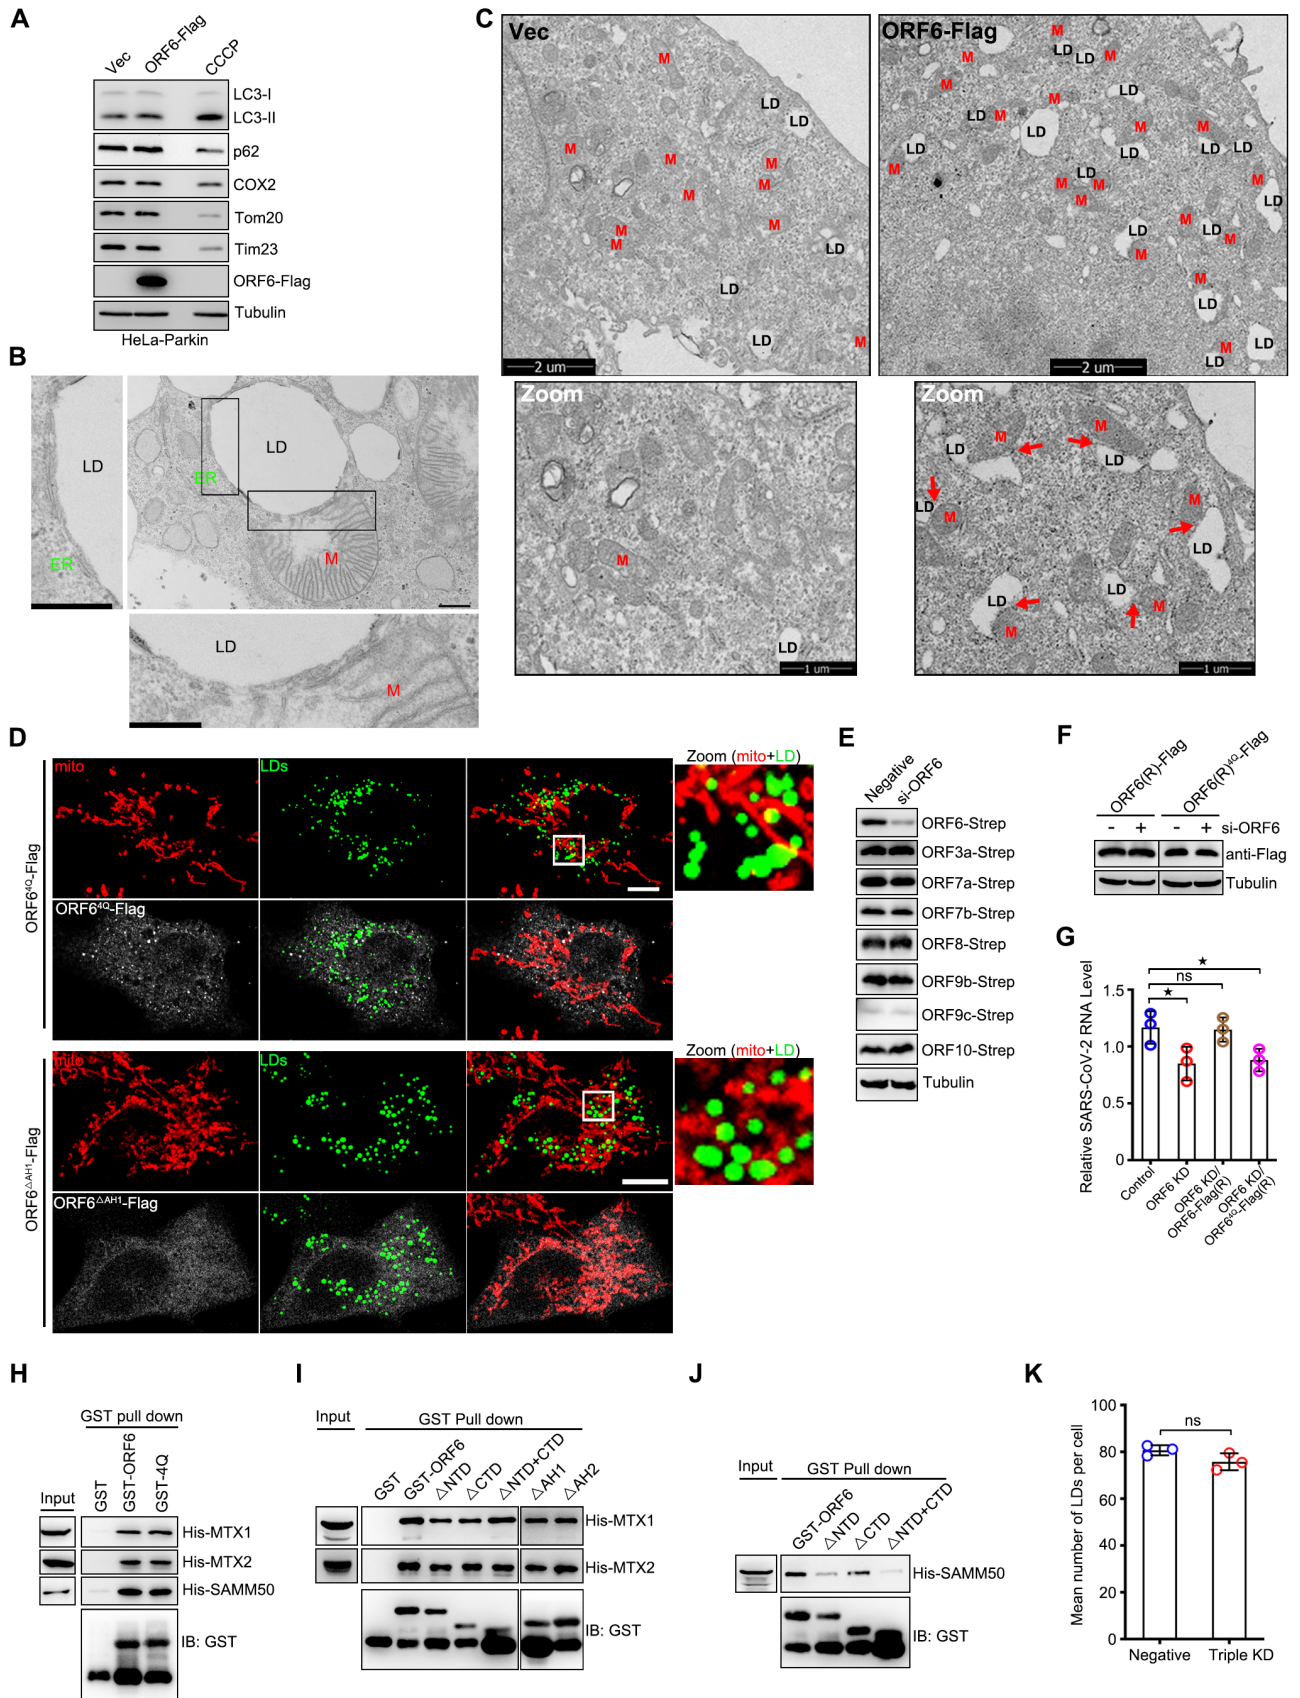

Figure EV5.
