# Supplementary material
Source: PubMed Central journal article supplement (PMC10308351)

**Fig7**

**A**

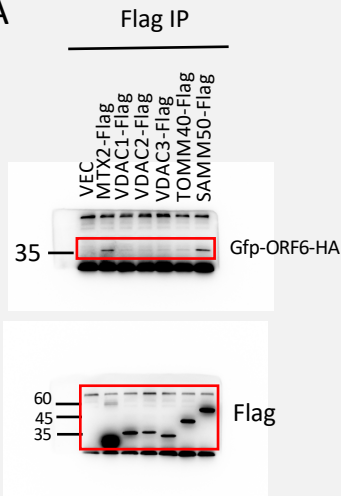

**B**

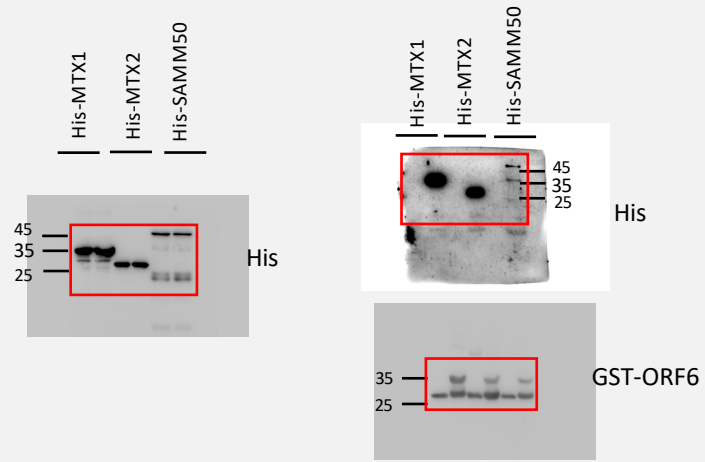

**C**

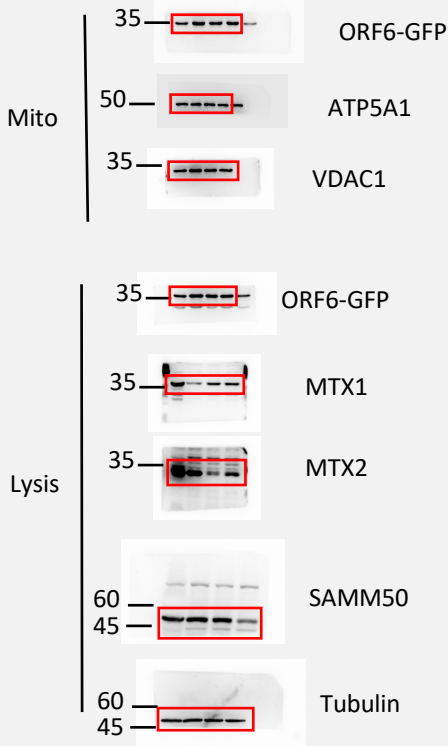

**D**

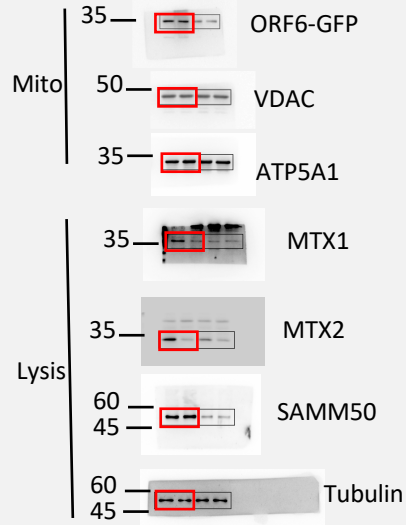

**E**

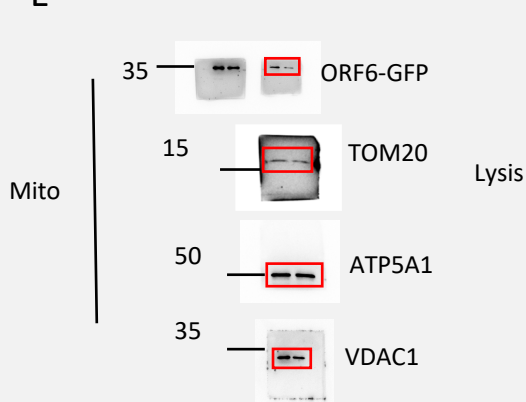

**H**

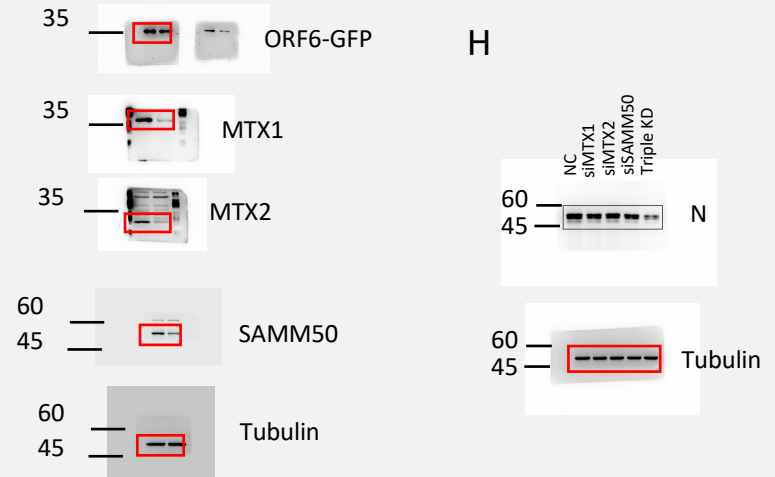

Supplement: EMBJ-42-e112542-s001.pdf [file EMBJ-42-e112542-s001.pdf]

**Fig2**

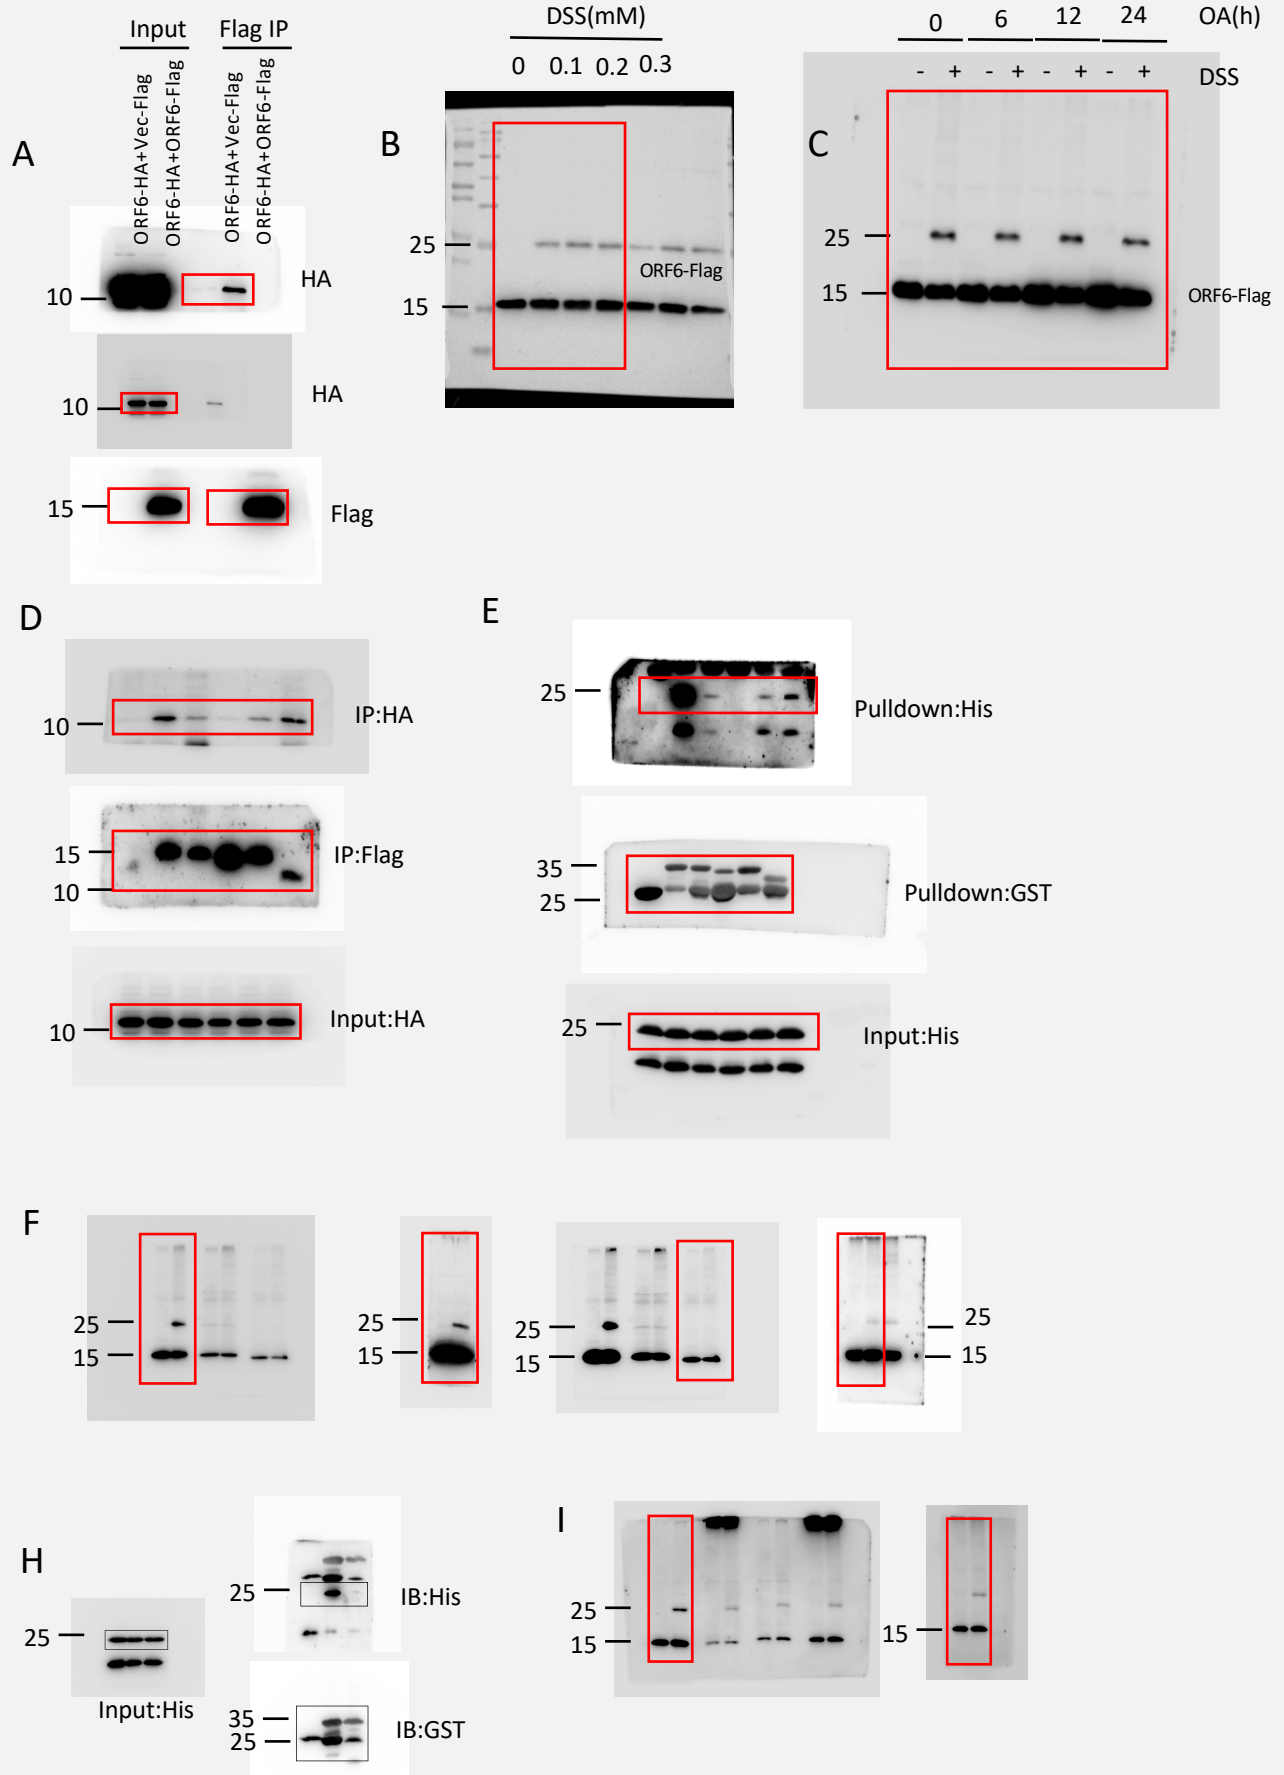

Supplement: EMBJ-42-e112542-s005.pdf [file EMBJ-42-e112542-s005.pdf]

**Fig3**

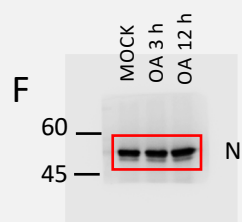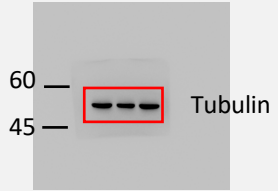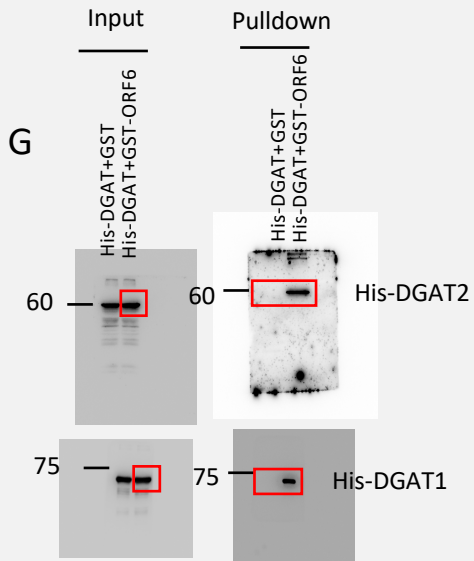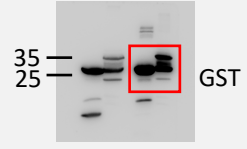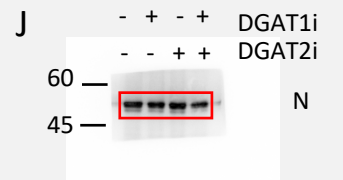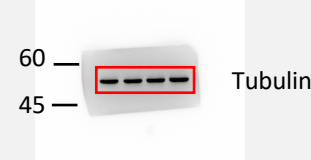

Supplement: EMBJ-42-e112542-s006.pdf [file EMBJ-42-e112542-s006.pdf]

**Fig6**

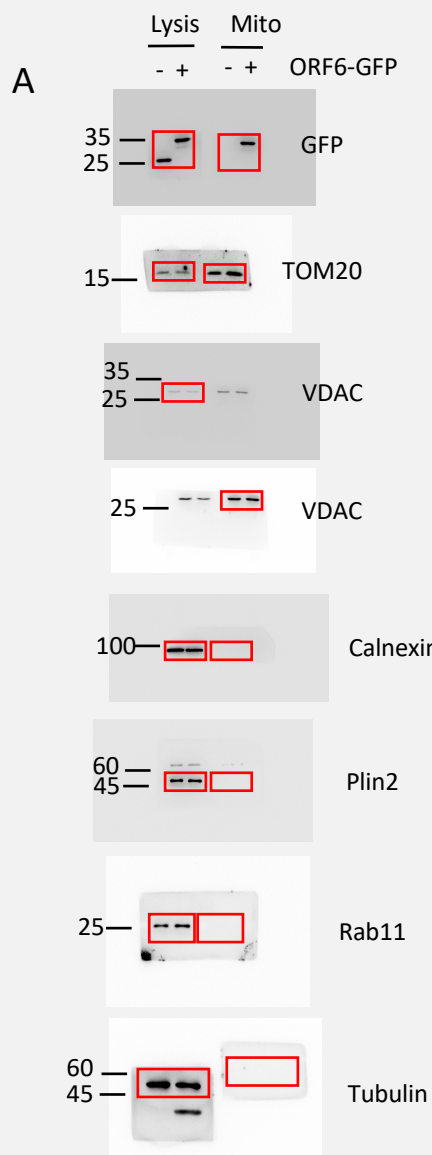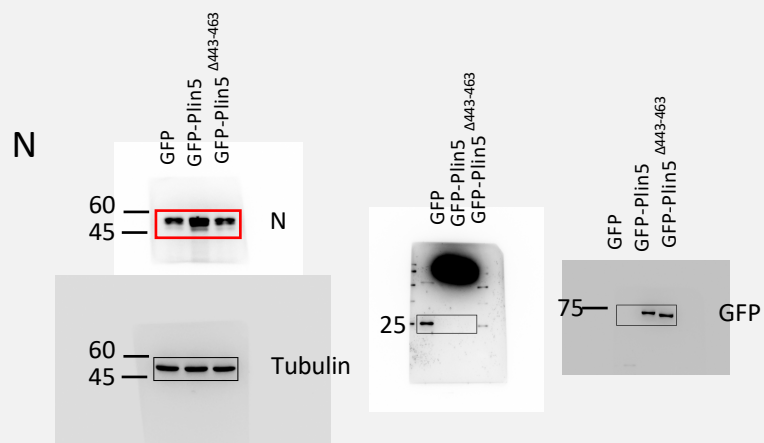

Supplement: EMBJ-42-e112542-s010.pdf [file EMBJ-42-e112542-s010.pdf]

**Fig5**

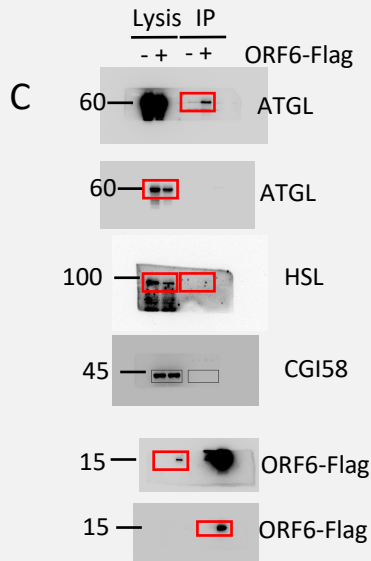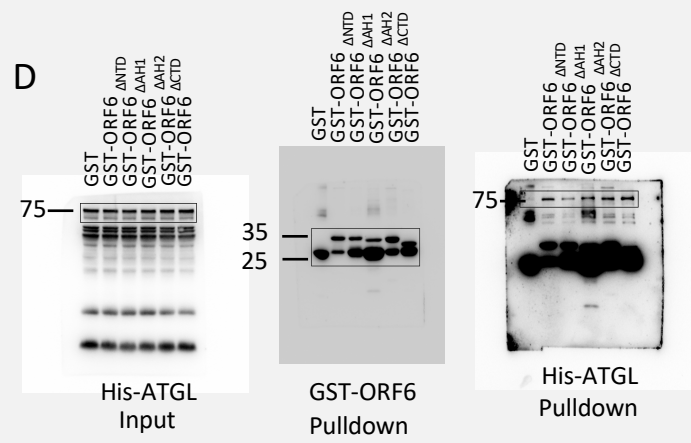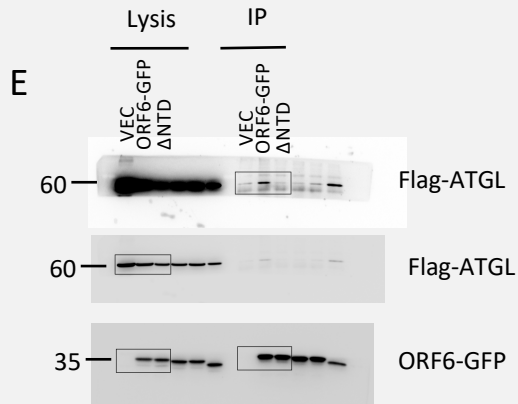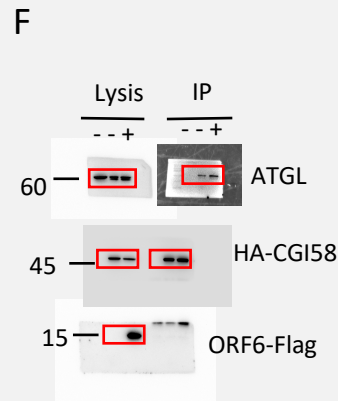

**Fig5**

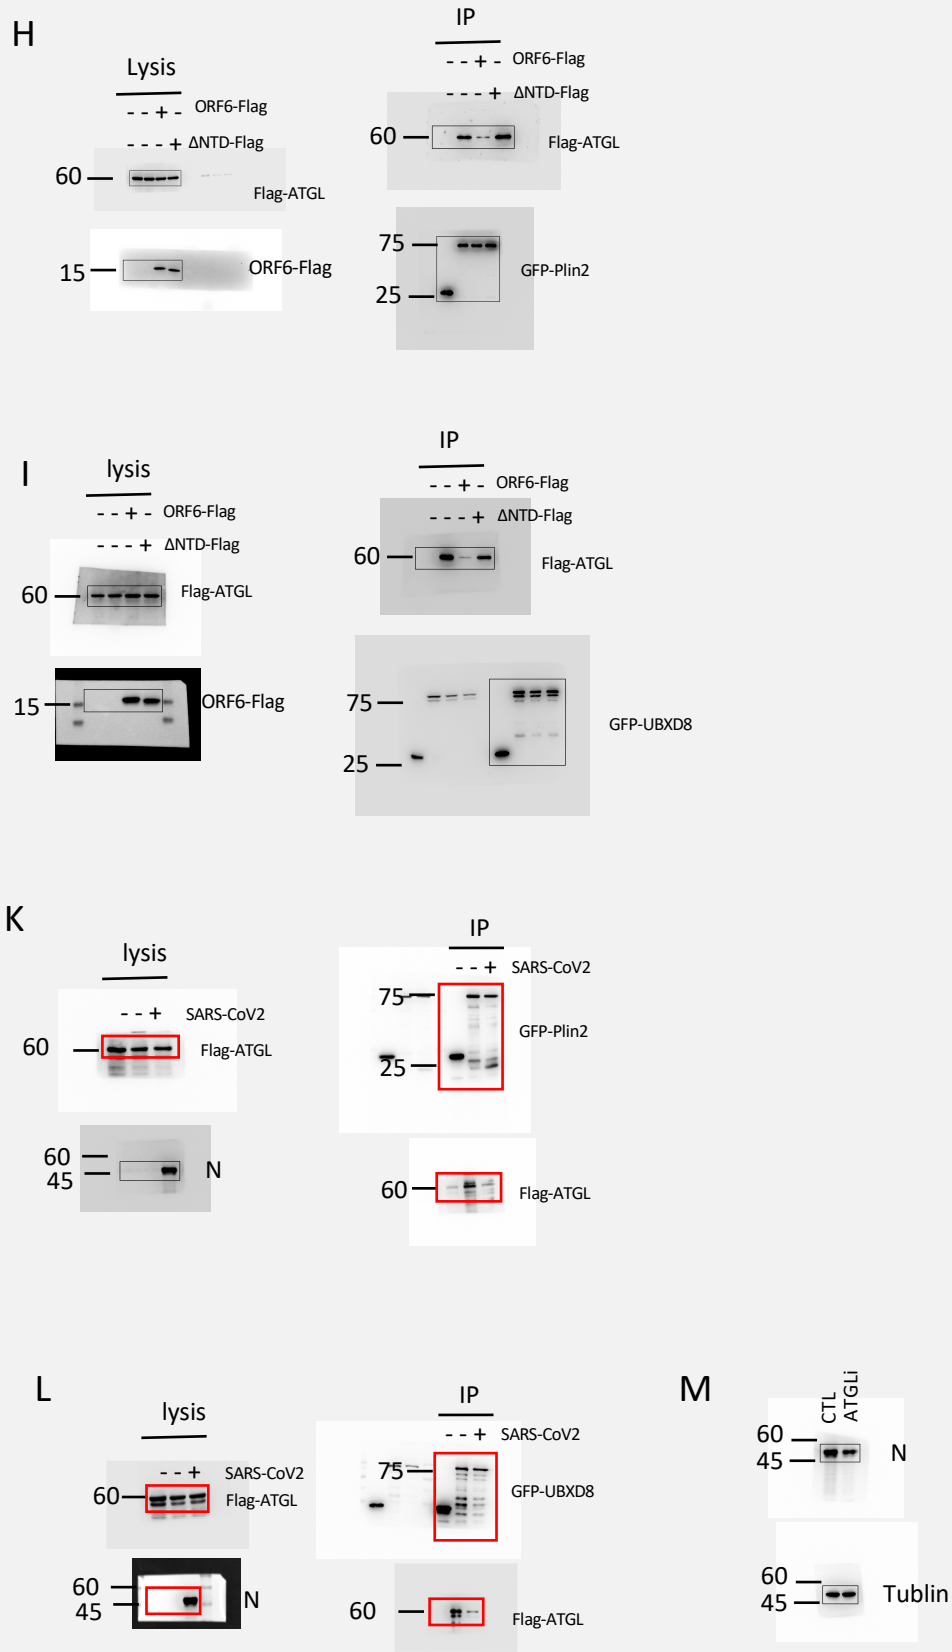

Supplement: EMBJ-42-e112542-s011.pdf [file EMBJ-42-e112542-s011.pdf]

**Fig4**

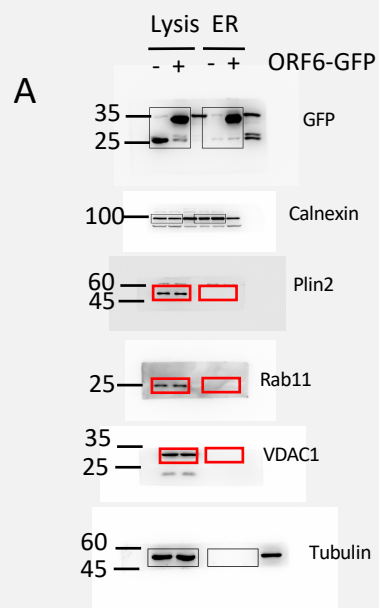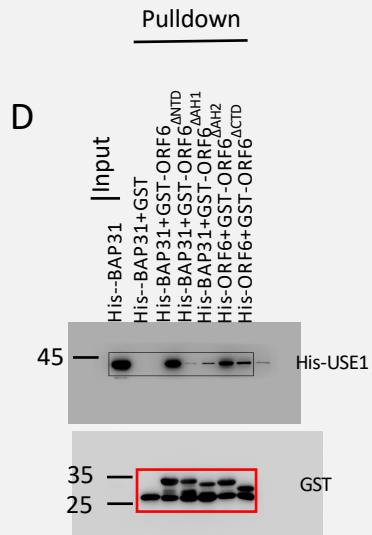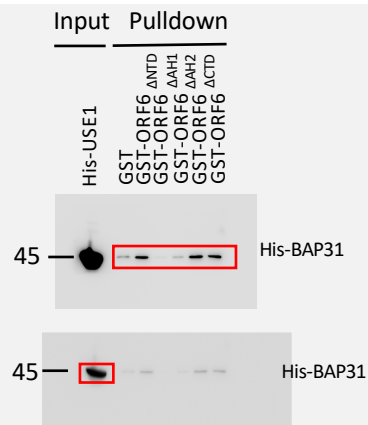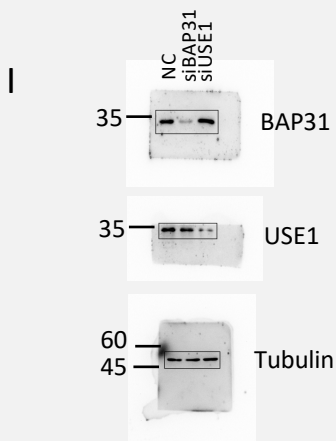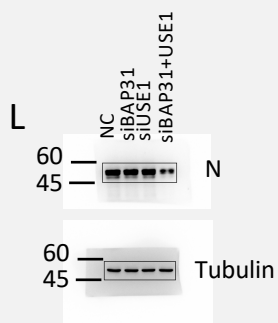

Supplement: EMBJ-42-e112542-s012.pdf [file EMBJ-42-e112542-s012.pdf]
